# Supplementary material for: Associations of Socioeconomic Status, Public vs Private Insurance, and Race/Ethnicity With Metastatic Sarcoma at Diagnosis
Source: PubMed Central journal article supplement (PMC7414392; doi:10.1001/jamanetworkopen.2020.11087), 2020-08-07
Supplement: jamanetwopen-3-e2011087-s001.pdf [file jamanetwopen-3-e2011087-s001.pdf]

## Supplementary Online Content

Diessner BJ, Weigel BJ, Murugan P, Zhang L, Poynter JN, Spector LG. Associations of socioeconomic status, public vs private insurance, and race/ethnicity with metastatic sarcoma at diagnosis. *JAMA Netw Open*. 2020;3(8):e2011087. doi:10.1001/jamanetworkopen.2020.11087

**eTable 1.** Soft Tissue and Bone Sarcoma Classifications and *ICD-O-3* Histology Codes

**eTable 2.** Multivariable Adjusted OR for Metastatic Sarcoma by SES, Stratified by Age Group and Sarcoma Subtype: SEER 16 Registries, 2001–2015

**eTable 3.** Distribution of Sarcoma Cases by Demographic and Clinical Characteristics: SEER 16 Registries, 2001-2015

**eTable 4.** Unadjusted OR for Metastatic Sarcoma by SES, Stratified by Age Group and Sarcoma Subtype SEER 16 Registries, 2001-2015

**eTable 5.** Unadjusted OR for Metastatic Sarcoma by Race/Ethnicity, Stratified by Age Group and Sarcoma Subtype: SEER 16 Registries, 2001–2015

**eTable 6.** Unadjusted OR for Metastases at Diagnosis in Adults (20–65 Years at Diagnosis) by Insurance Status, Stratified by Sarcoma Subtype: SEER 16 Registries (2007–2015)

This supplementary material has been provided by the authors to give readers additional information about their work.

| eTable 1. Soft Tissue and Bone Sarcoma Classifications and ICD-O-3 Histology Codes                                                                                                                                              |                                          |
|---------------------------------------------------------------------------------------------------------------------------------------------------------------------------------------------------------------------------------|------------------------------------------|
| Histologic classifications                                                                                                                                                                                                      | ICD-O-3 histology codes                  |
| <b>Soft tissue sarcomas*</b>                                                                                                                                                                                                    |                                          |
| Liposarcoma                                                                                                                                                                                                                     | 8850, 8851-8855, 8858                    |
| Fibroblastic/Myofibroblastic tumors                                                                                                                                                                                             | 8810, 8811, 8815, 8815, 8825, 8832, 8840 |
| Leiomyosarcoma                                                                                                                                                                                                                  | 8890                                     |
| Malignant glomus tumor                                                                                                                                                                                                          | 8711                                     |
| Embryonal rhabdomyosarcoma                                                                                                                                                                                                      | 8910                                     |
| Alveolar rhabdomyosarcoma                                                                                                                                                                                                       | 8920                                     |
| Other rhabdomyosarcoma                                                                                                                                                                                                          | 8900, 8901, 8912                         |
| Malignant vascular tumors                                                                                                                                                                                                       | 9120, 9133                               |
| Synovial sarcoma                                                                                                                                                                                                                | 9040, 9041,9043                          |
| Epithelioid sarcoma                                                                                                                                                                                                             | 8804                                     |
| Alveolar soft part sarcoma                                                                                                                                                                                                      | 9581                                     |
| Clear Cell Sarcoma of Soft tissue                                                                                                                                                                                               | 9044                                     |
| Extraskeletal mesenchymal chondrosarcoma                                                                                                                                                                                        | 9240                                     |
| Malignant ossifying fibromyxoid tumor                                                                                                                                                                                           | 8842                                     |
| Myoepithelial carcinoma                                                                                                                                                                                                         | 8982                                     |
| Malignant phosphaturic mesenchymal tumor                                                                                                                                                                                        | 8990                                     |
| Extra skeletal myxoid chondrosarcoma                                                                                                                                                                                            | 9231                                     |
| Ewing sarcoma soft tissue                                                                                                                                                                                                       | 9260, 9364                               |
| Desmoplastic small round cell tumor                                                                                                                                                                                             | 8806                                     |
| Extra-renal rhabdoid tumor                                                                                                                                                                                                      | 8963                                     |
| Gastrointestinal stromal tumor                                                                                                                                                                                                  | 8936                                     |
| Malignant peripheral nerve sheath tumor                                                                                                                                                                                         | 8921, 9540, 9561, 9571, 9580             |
| Extra-skeletal osteosarcoma                                                                                                                                                                                                     | 9180                                     |
| Undifferentiated pleomorphic sarcoma                                                                                                                                                                                            | 8830                                     |
| unclassified sarcomas                                                                                                                                                                                                           | 8800 – 8803, 8805                        |
| <b>Bone Sarcomas**</b>                                                                                                                                                                                                          |                                          |
| Osteosarcoma                                                                                                                                                                                                                    | 9180 – 9183, 9185, 9187, 9192 - 9194     |
| Chondrosarcoma                                                                                                                                                                                                                  | 9220, 9221, 9240, 9242, 9243             |
| Fibrosarcoma of bone                                                                                                                                                                                                            | 8810                                     |
| Malignancy in giant cell tumor of bone                                                                                                                                                                                          | 9250                                     |
| Ewing sarcoma of bone                                                                                                                                                                                                           | 9364, 9260                               |
| Undifferentiated pleomorphic sarcoma of bone                                                                                                                                                                                    | 8830                                     |
| Chordoma                                                                                                                                                                                                                        | 9370                                     |
| Epithelioid haemangioendothelioma of bone                                                                                                                                                                                       | 9133                                     |
| Angiosarcoma of bone                                                                                                                                                                                                            | 9120                                     |
| Leiomyosarcoma of bone                                                                                                                                                                                                          | 8890                                     |
| Liposarcoma of bone                                                                                                                                                                                                             | 8850                                     |
| *Occurring in any sites other than bones and joints. **Occurring in bones and joints. Only ICD-O-3 codes with malignant behavior included. Only subtypes with > 100 metastatic cases within an age group strata were evaluated. |                                          |

eTable 2. Multivariable Adjusted OR for Metastatic Sarcoma by SES, Stratified by Age Group and Sarcoma Subtype: SEER 16 Registries, 2001–2015<sup>a</sup>

|                                  | Small-area SES |                   |                   |                   |                   |                          |
|----------------------------------|----------------|-------------------|-------------------|-------------------|-------------------|--------------------------|
|                                  | Q1             | Q2                | Q3                | Q4                | Q5                | Ordinal SES <sup>b</sup> |
| <b>Pediatric (&lt; 20 years)</b> |                |                   |                   |                   |                   |                          |
| Osteosarcoma                     | Ref            | 0.97 (0.6, 1.56)  | 0.75 (0.45, 1.25) | 0.76 (0.45, 1.28) | 0.66 (0.38, 1.14) | 0.9 (0.79, 1.01)         |
| ES of bone                       | Ref            | 0.63 (0.33, 1.21) | 0.5 (0.26, 0.93)  | 0.69 (0.36, 1.35) | 0.64 (0.34, 1.21) | 0.94 (0.81, 1.08)        |
| ARMS                             | Ref            | 0.89 (0.41, 1.95) | 0.84 (0.37, 1.93) | 0.65 (0.27, 1.52) | 0.77 (0.34, 1.76) | 0.92 (0.77, 1.11)        |
| Embryonal RMS                    | Ref            | 0.94 (0.45, 1.96) | 0.76 (0.35, 1.65) | 1.02 (0.48, 2.16) | 0.67 (0.31, 1.44) | 0.93 (0.78, 1.1)         |
| <b>Adult (20 - 65 years)</b>     |                |                   |                   |                   |                   |                          |
| Osteosarcoma                     | Ref            | 0.76 (0.4, 1.42)  | 1.1 (0.61, 2)     | 0.87 (0.46, 1.63) | 0.7 (0.36, 1.33)  | 0.94 (0.81, 1.09)        |
| ES of bone                       | Ref            | 1.08 (0.45, 2.62) | 1.1 (0.45, 2.71)  | 1.27 (0.51, 3.16) | 1.01 (0.42, 2.5)  | 1.01 (0.83, 1.23)        |
| Chondrosarcoma                   | Ref            | 1.93 (0.83, 4.79) | 1.61 (0.69, 4.02) | 1.52 (0.66, 3.76) | 1.52 (0.66, 3.8)  | 1.03 (0.87, 1.23)        |
| Other RMS                        | Ref            | 1.62 (0.62, 4.32) | 1.31 (0.51, 3.4)  | 1.06 (0.4, 2.82)  | 1.28 (0.48, 3.46) | 1 (0.81, 1.25)           |
| F/MF tumors                      | Ref            | 0.7 (0.32, 1.48)  | 0.96 (0.49, 1.91) | 0.82 (0.41, 1.68) | 0.71 (0.35, 1.45) | 0.94 (0.81, 1.11)        |
| Synovial sarcoma                 | Ref            | 0.75 (0.42, 1.34) | 0.6 (0.32, 1.11)  | 0.57 (0.3, 1.04)  | 0.71 (0.39, 1.3)  | 0.91 (0.79, 1.05)        |
| ES of soft tissue                | Ref            | 1.2 (0.5, 2.91)   | 1.61 (0.68, 3.9)  | 0.66 (0.25, 1.72) | 0.93 (0.37, 2.37) | 0.93 (0.76, 1.14)        |
| MPNST                            | Ref            | 1 (0.48, 2.07)    | 0.95 (0.44, 2)    | 1.51 (0.75, 3.09) | 0.55 (0.22, 1.32) | 0.96 (0.8, 1.15)         |
| DSRCT                            | Ref            | 1.27 (0.28, 5.78) | 0.84 (0.19, 3.56) | 0.48 (0.1, 2.17)  | 0.55 (0.12, 2.34) | 0.81 (0.57, 1.13)        |
| GIST                             | Ref            | 1.04 (0.75, 1.45) | 0.91 (0.65, 1.26) | 0.88 (0.63, 1.22) | 0.9 (0.65, 1.25)  | 0.96 (0.89, 1.04)        |
| Leiomyosarcoma                   | Ref            | 1.05 (0.8, 1.36)  | 0.84 (0.64, 1.1)  | 0.94 (0.72, 1.22) | 0.86 (0.66, 1.13) | 0.96 (0.9, 1.02)         |
| Liposarcoma                      | Ref            | 0.92 (0.55, 1.54) | 0.92 (0.56, 1.52) | 0.71 (0.42, 1.21) | 0.52 (0.3, 0.9)   | 0.85 (0.76, 0.96)        |
| Malignant vascular tumors        | Ref            | 1.05 (0.57, 1.93) | 0.8 (0.43, 1.47)  | 0.9 (0.49, 1.66)  | 0.73 (0.39, 1.36) | 0.92 (0.81, 1.06)        |
| UPS                              | Ref            | 0.92 (0.43, 1.95) | 0.7 (0.32, 1.49)  | 0.96 (0.48, 1.97) | 0.77 (0.38, 1.6)  | 0.96 (0.81, 1.13)        |
| Unclassified sarcomas            | Ref            | 0.7 (0.45, 1.09)  | 0.74 (0.48, 1.13) | 0.64 (0.41, 1)    | 0.64 (0.41, 1)    | 0.91 (0.82, 1)           |
| <b>Older Adult (65 years + )</b> |                |                   |                   |                   |                   |                          |
| GIST                             | Ref            | 1.09 (0.75, 1.57) | 0.96 (0.65, 1.41) | 1.02 (0.7, 1.48)  | 0.88 (0.6, 1.29)  | 0.97 (0.89, 1.05)        |
| Leiomyosarcoma                   | Ref            | 1.08 (0.73, 1.59) | 1.06 (0.72, 1.56) | 1.11 (0.75, 1.64) | 0.93 (0.63, 1.37) | 0.98 (0.9, 1.07)         |
| Liposarcoma                      | Ref            | 1.06 (0.53, 2.18) | 1.21 (0.63, 2.41) | 0.94 (0.48, 1.89) | 1.23 (0.65, 2.42) | 1.03 (0.9, 1.19)         |
| Malignant vascular tumors        | Ref            | 0.88 (0.41, 1.91) | 1.05 (0.51, 2.19) | 0.92 (0.46, 1.89) | 1.14 (0.57, 2.36) | 1.04 (0.89, 1.21)        |
| UPS                              | Ref            | 0.57 (0.27, 1.17) | 0.71 (0.36, 1.4)  | 0.59 (0.3, 1.19)  | 0.59 (0.3, 1.15)  | 0.91 (0.78, 1.06)        |
| Unclassified sarcomas            | Ref            | 0.6 (0.35, 1.02)  | 0.6 (0.36, 1.01)  | 0.62 (0.37, 1.03) | 0.58 (0.35, 0.96) | 0.91 (0.81, 1.02)        |

Abbreviations: ES = Ewing sarcoma; RMS = rhabdomyosarcoma; ARMS = alveolar RMS; F/MF. = fibroblastic or myofibroblastic; MPNST = malignant peripheral nerve sheath tumor; DSRCT = desmoplastic small round cell tumor, GIST = gastrointestinal stromal tumor, UPS = undifferentiated pleomorphic sarcoma; Ref = reference category; Q1 corresponds to lowest SES quintile, Q5 corresponds to highest. <sup>a</sup>All data reported as odds ratio (99% CI) and are adjusted for race, sex, age at diagnosis, and year of diagnosis. <sup>b</sup>Results obtained from evaluating SES as an ordinal variable.

eTable 3. Distribution of Sarcoma Cases by Demographic and Clinical Characteristics: SEER 16 Registries, 2001-2015<sup>a</sup>

|                              | Total, No. | No. (%)       |               |                |             |             |            |             |             |             |             |             |               |             |
|------------------------------|------------|---------------|---------------|----------------|-------------|-------------|------------|-------------|-------------|-------------|-------------|-------------|---------------|-------------|
|                              |            | Sex           |               | Race/ethnicity |             |             |            | SES         |             |             |             |             | Stage         |             |
|                              |            | Male          | Female        | NHW            | NHB         | H           | AIAN /API  | Q1          | Q2          | Q3          | Q4          | Q5          | L/R           | D           |
| <b>All ages at diagnosis</b> |            |               |               |                |             |             |            |             |             |             |             |             |               |             |
| Bone sarcomas                | 5616       | 3160 (56.3)   | 2456 (43.7)   | 3368 (60)      | 521 (9.3)   | 1324 (23.6) | 403 (7.2)  | 993 (17.7)  | 1071 (19.1) | 1145 (20.4) | 1125 (20)   | 1282 (22.8) | 4462 (79.5)   | 1154 (20.5) |
| Soft tissue sarcomas         | 41,721     | 21,183 (50.8) | 20,538 (49.2) | 26,607 (63.8)  | 5152 (12.3) | 6180 (14.8) | 3782 (9.1) | 6860 (16.4) | 7605 (18.2) | 8298 (19.9) | 9067 (21.7) | 9891 (23.7) | 34,493 (82.7) | 7228 (17.3) |
| <b>Pediatric (&lt;20 y)</b>  |            |               |               |                |             |             |            |             |             |             |             |             |               |             |
| Osteosarcoma                 | 1521       | 854 (56.1)    | 667 (43.9)    | 678 (44.6)     | 229 (15.1)  | 490 (32.2)  | 124 (8.2)  | 302 (19.9)  | 329 (21.6)  | 297 (19.5)  | 296 (19.5)  | 297 (19.5)  | 1176 (77.3)   | 345 (22.7)  |
| ES of bone                   | 893        | 539 (60.4)    | 354 (39.6)    | 587 (65.7)     | 21 (2.4)    | 221 (24.7)  | 64 (7.2)   | 127 (14.2)  | 167 (18.7)  | 210 (23.5)  | 159 (17.8)  | 230 (25.8)  | 612 (68.5)    | 281 (31.5)  |
| ARMS                         | 474        | 254 (53.6)    | 220 (46.4)    | 213 (44.9)     | 77 (16.2)   | 135 (28.5)  | 49 (10.3)  | 88 (18.6)   | 104 (21.9)  | 85 (17.9)   | 90 (19)     | 107 (22.6)  | 251 (53)      | 223 (47)    |
| Embryonal RMS                | 725        | 447 (61.7)    | 278 (38.3)    | 398 (54.9)     | 104 (14.3)  | 180 (24.8)  | 43 (5.9)   | 132 (18.2)  | 144 (19.9)  | 138 (19)    | 136 (18.8)  | 175 (24.1)  | 570 (78.6)    | 155 (21.4)  |
| <b>Adult (20-65 y)</b>       |            |               |               |                |             |             |            |             |             |             |             |             |               |             |
| Osteosarcoma                 | 1150       | 632 (55)      | 518 (45)      | 628 (54.6)     | 152 (13.2)  | 265 (23)    | 105 (9.1)  | 246 (21.4)  | 203 (17.7)  | 238 (20.7)  | 220 (19.1)  | 243 (21.1)  | 933 (81.1)    | 217 (18.9)  |
| ES of bone                   | 419        | 273 (65.2)    | 146 (34.8)    | 309 (73.7)     | 15 (3.6)    | 75 (17.9)   | 20 (4.8)   | 74 (17.7)   | 85 (20.3)   | 78 (18.6)   | 82 (19.6)   | 100 (23.9)  | 249 (59.4)    | 170 (40.6)  |
| Chondrosarcoma               | 1633       | 862 (52.8)    | 771 (47.2)    | 1166 (71.4)    | 104 (6.4)   | 273 (16.7)  | 90 (5.5)   | 244 (14.9)  | 287 (17.6)  | 322 (19.7)  | 368 (22.5)  | 412 (25.2)  | 1492 (91.4)   | 141 (8.6)   |
| Other RMS                    | 342        | 198 (57.9)    | 144 (42.1)    | 176 (51.5)     | 57 (16.7)   | 73 (21.3)   | 36 (10.5)  | 64 (18.7)   | 62 (18.1)   | 74 (21.6)   | 71 (20.8)   | 71 (20.8)   | 212 (62)      | 130 (38)    |
| F/MF tumors                  | 5198       | 2480 (47.7)   | 2718 (52.3)   | 2960 (56.9)    | 980 (18.9)  | 786 (15.1)  | 472 (9.1)  | 906 (17.4)  | 922 (17.7)  | 1052 (20.2) | 1083 (20.8) | 1235 (23.8) | 5051 (97.2)   | 147 (2.8)   |
| Synovial sarcoma             | 1299       | 696 (53.6)    | 603 (46.4)    | 731 (56.3)     | 131 (10.1)  | 335 (25.8)  | 102 (7.9)  | 241 (18.6)  | 262 (20.2)  | 257 (19.8)  | 270 (20.8)  | 269 (20.7)  | 1072 (82.5)   | 227 (17.5)  |
| ES of soft tissue            | 418        | 220 (52.6)    | 198 (47.4)    | 259 (62)       | 17 (4.1)    | 91 (21.8)   | 51 (12.2)  | 72 (17.2)   | 89 (21.3)   | 92 (22)     | 83 (19.9)   | 82 (19.6)   | 271 (64.8)    | 147 (35.2)  |

|                                     |      |                |                |                |               |               |               |               |                |                |                |                |                |                |
|-------------------------------------|------|----------------|----------------|----------------|---------------|---------------|---------------|---------------|----------------|----------------|----------------|----------------|----------------|----------------|
| MPNST                               | 976  | 532<br>(54.5)  | 444<br>(45.5)  | 558<br>(57.2)  | 151<br>(15.5) | 178<br>(18.2) | 89<br>(9.1)   | 218<br>(22.3) | 190<br>(19.5)  | 198<br>(20.3)  | 190<br>(19.5)  | 180<br>(18.4)  | 833<br>(85.3)  | 143<br>(14.7)  |
| DSRCT                               | 187  | 154<br>(82.4)  | 33<br>(17.6)   | 96<br>(51.3)   | 38<br>(20.3)  | 36<br>(19.3)  | 17<br>(9.1)   | 34<br>(18.2)  | 39<br>(20.9)   | 45<br>(24.1)   | 29<br>(15.5)   | 40<br>(21.4)   | 53<br>(28.3)   | 134<br>(71.7)  |
| GIST                                | 3647 | 2029<br>(55.6) | 1618<br>(44.4) | 1971<br>(54)   | 662<br>(18.2) | 524<br>(14.4) | 490<br>(13.4) | 671<br>(18.4) | 664<br>(18.2)  | 712<br>(19.5)  | 770<br>(21.1)  | 830<br>(22.8)  | 2730<br>(74.9) | 917<br>(25.1)  |
| Leiomyo<br>sarcoma                  | 5689 | 1520<br>(26.7) | 4169<br>(73.3) | 3335<br>(58.6) | 877<br>(15.4) | 972<br>(17.1) | 505<br>(8.9)  | 963<br>(16.9) | 1043<br>(18.3) | 1087<br>(19.1) | 1316<br>(23.1) | 1280<br>(22.5) | 4240<br>(74.5) | 1449<br>(25.5) |
| Liposarc<br>oma                     | 4620 | 2769<br>(59.9) | 1851<br>(40.1) | 2899<br>(62.7) | 418<br>(9)    | 904<br>(19.6) | 399<br>(8.6)  | 720<br>(15.6) | 811<br>(17.6)  | 935<br>(20.2)  | 1007<br>(21.8) | 1147<br>(24.8) | 4343<br>(94)   | 277<br>(6)     |
| Maligna<br>nt<br>vascular<br>Tumors | 877  | 463<br>(52.8)  | 414<br>(47.2)  | 567<br>(64.7)  | 96<br>(10.9)  | 135<br>(15.4) | 79<br>(9)     | 137<br>(15.6) | 172<br>(19.6)  | 181<br>(20.6)  | 191<br>(21.8)  | 196<br>(22.3)  | 550<br>(62.7)  | 327<br>(37.3)  |
| UPS                                 | 1481 | 909<br>(61.4)  | 572<br>(38.6)  | 1026<br>(69.3) | 134<br>(9)    | 225<br>(15.2) | 96<br>(6.5)   | 240<br>(16.2) | 237<br>(16)    | 288<br>(19.4)  | 330<br>(22.3)  | 386<br>(26.1)  | 1327<br>(89.6) | 154<br>(10.4)  |
| Unclassi<br>fied<br>sarcoma<br>s    | 2103 | 1125<br>(53.5) | 978<br>(46.5)  | 1283<br>(61)   | 272<br>(12.9) | 366<br>(17.4) | 182<br>(8.7)  | 386<br>(18.4) | 388<br>(18.4)  | 427<br>(20.3)  | 428<br>(20.4)  | 474<br>(22.5)  | 1637<br>(77.8) | 466<br>(22.2)  |
| <b>Older adult (&gt;65 y)</b>       |      |                |                |                |               |               |               |               |                |                |                |                |                |                |
| GIST                                | 2982 | 1457<br>(48.9) | 1525<br>(51.1) | 1840<br>(61.7) | 439<br>(14.7) | 281<br>(9.4)  | 422<br>(14.2) | 504<br>(16.9) | 571<br>(19.1)  | 556<br>(18.6)  | 656<br>(22)    | 695<br>(23.3)  | 2284<br>(76.6) | 698<br>(23.4)  |
| Leiomyo<br>sarcoma                  | 2959 | 1186<br>(40.1) | 1773<br>(59.9) | 2202<br>(74.4) | 311<br>(10.5) | 262<br>(8.9)  | 184<br>(6.2)  | 468<br>(15.8) | 553<br>(18.7)  | 604<br>(20.4)  | 612<br>(20.7)  | 722<br>(24.4)  | 2271<br>(76.7) | 688<br>(23.3)  |
| Liposarc<br>oma                     | 2620 | 1624<br>(62)   | 996<br>(38)    | 1933<br>(73.8) | 143<br>(5.5)  | 317<br>(12.1) | 227<br>(8.7)  | 361<br>(13.8) | 455<br>(17.4)  | 515<br>(19.7)  | 605<br>(23.1)  | 684<br>(26.1)  | 2418<br>(92.3) | 202<br>(7.7)   |
| Maligna<br>nt<br>vascular<br>Tumors | 910  | 520<br>(57.1)  | 390<br>(42.9)  | 689<br>(75.7)  | 40<br>(4.4)   | 84<br>(9.2)   | 97<br>(10.7)  | 125<br>(13.7) | 147<br>(16.2)  | 188<br>(20.7)  | 236<br>(25.9)  | 214<br>(23.5)  | 698<br>(76.7)  | 212<br>(23.3)  |
| UPS                                 | 2319 | 1551<br>(66.9) | 768<br>(33.1)  | 1959<br>(84.5) | 84<br>(3.6)   | 153<br>(6.6)  | 123<br>(5.3)  | 285<br>(12.3) | 414<br>(17.9)  | 487<br>(21)    | 517<br>(22.3)  | 616<br>(26.6)  | 2151<br>(92.8) | 168<br>(7.2)   |
| Unclassi<br>fied<br>sarcoma<br>s    | 1895 | 1049<br>(55.4) | 846<br>(44.6)  | 1512<br>(79.8) | 121<br>(6.4)  | 143<br>(7.5)  | 119<br>(6.3)  | 245<br>(12.9) | 338<br>(17.8)  | 377<br>(19.9)  | 447<br>(23.6)  | 488<br>(25.8)  | 1531<br>(80.8) | 364<br>(19.2)  |

Q1 corresponds to lowest SES quintile, Q5 corresponds to highest.

Abbreviations: AIAIN/API, American Indian, Alaskan native, Asian Pacific Islander; ARMS, alveolar rhabdomyosarcoma; B, Black; D, distant; DSRCT, desmoplastic small round cell tumor, GIST, gastrointestinal stromal tumor; ES, Ewing sarcoma; F/MF, fibroblastic or myofibroblastic; H, Hispanic; L/R, localized or regional; NH, Non-Hispanic; RMS, rhabdomyosarcoma; SEER, Surveillance, Epidemiology, and End Results Program; SES, socioeconomic status; UPS, undifferentiated pleomorphic sarcoma; W, White.

<sup>a</sup>All data reported as number (percent of total).

| eTable 4. Unadjusted OR for Metastatic Sarcoma by SES, Stratified by Age Group and Sarcoma Subtype<br>SEER 16 Registries, 2001-2015 <sup>a</sup> |                |                   |                   |                   |                   |                          |
|--------------------------------------------------------------------------------------------------------------------------------------------------|----------------|-------------------|-------------------|-------------------|-------------------|--------------------------|
|                                                                                                                                                  | Small-area SES |                   |                   |                   |                   |                          |
|                                                                                                                                                  | Q1             | Q2                | Q3                | Q4                | Q5                | Ordinal SES <sup>b</sup> |
| <b>Pediatric (&lt; 20 years)</b>                                                                                                                 |                |                   |                   |                   |                   |                          |
| Osteosarcoma                                                                                                                                     | Ref            | 0.95 (0.6, 1.52)  | 0.72 (0.44, 1.18) | 0.72 (0.44, 1.19) | 0.62 (0.37, 1.03) | 0.88 (0.79, 0.99)        |
| ES of bone                                                                                                                                       | Ref            | 0.63 (0.33, 1.19) | 0.48 (0.26, 0.89) | 0.64 (0.34, 1.21) | 0.64 (0.35, 1.15) | 0.93 (0.81, 1.06)        |
| ARMS                                                                                                                                             | Ref            | 1 (0.47, 2.11)    | 0.89 (0.4, 1.95)  | 0.7 (0.32, 1.52)  | 0.88 (0.42, 1.84) | 0.94 (0.8, 1.11)         |
| Embryonal RMS                                                                                                                                    | Ref            | 0.93 (0.45, 1.94) | 0.76 (0.35, 1.63) | 1 (0.48, 2.1)     | 0.65 (0.31, 1.35) | 0.92 (0.78, 1.08)        |
| <b>Adult (20 - 65 years)</b>                                                                                                                     |                |                   |                   |                   |                   |                          |
| Osteosarcoma                                                                                                                                     | Ref            | 0.74 (0.39, 1.37) | 0.97 (0.55, 1.71) | 0.79 (0.43, 1.44) | 0.64 (0.34, 1.17) | 0.92 (0.8, 1.05)         |
| ES of bone                                                                                                                                       | Ref            | 0.92 (0.4, 2.13)  | 0.91 (0.39, 2.15) | 1.09 (0.47, 2.52) | 0.85 (0.38, 1.91) | 0.98 (0.82, 1.17)        |
| Chondrosarcoma                                                                                                                                   | Ref            | 1.78 (0.78, 4.35) | 1.51 (0.66, 3.7)  | 1.45 (0.65, 3.52) | 1.42 (0.64, 3.4)  | 1.02 (0.87, 1.21)        |
| Other RMS                                                                                                                                        | Ref            | 1.57 (0.61, 4.1)  | 1.23 (0.49, 3.11) | 0.97 (0.38, 2.51) | 1.17 (0.46, 2.99) | 0.98 (0.8, 1.21)         |
| F/MF tumors                                                                                                                                      | Ref            | 0.7 (0.33, 1.48)  | 0.98 (0.5, 1.93)  | 0.89 (0.45, 1.77) | 0.83 (0.43, 1.63) | 0.98 (0.84, 1.14)        |
| Synovial sarcoma                                                                                                                                 | Ref            | 0.76 (0.42, 1.34) | 0.62 (0.34, 1.12) | 0.58 (0.32, 1.06) | 0.75 (0.42, 1.33) | 0.92 (0.8, 1.05)         |
| ES of soft tissue                                                                                                                                | Ref            | 1.09 (0.47, 2.57) | 1.36 (0.59, 3.17) | 0.6 (0.24, 1.48)  | 0.82 (0.34, 1.99) | 0.9 (0.74, 1.1)          |
| MPNST                                                                                                                                            | Ref            | 0.97 (0.47, 1.99) | 0.92 (0.45, 1.89) | 1.45 (0.74, 2.86) | 0.51 (0.21, 1.16) | 0.95 (0.8, 1.11)         |
| DSRCT                                                                                                                                            | Ref            | 1.4 (0.33, 6.09)  | 1.11 (0.28, 4.29) | 0.59 (0.14, 2.4)  | 0.67 (0.17, 2.46) | 0.84 (0.62, 1.14)        |
| GIST                                                                                                                                             | Ref            | 1.07 (0.78, 1.48) | 0.95 (0.69, 1.3)  | 0.92 (0.67, 1.27) | 0.95 (0.7, 1.3)   | 0.98 (0.91, 1.05)        |
| Leiomyosarcoma                                                                                                                                   | Ref            | 0.95 (0.73, 1.22) | 0.74 (0.57, 0.95) | 0.81 (0.64, 1.04) | 0.7 (0.55, 0.9)   | 0.92 (0.87, 0.97)        |
| Liposarcoma                                                                                                                                      | Ref            | 0.91 (0.55, 1.53) | 0.92 (0.56, 1.52) | 0.71 (0.43, 1.19) | 0.53 (0.31, 0.89) | 0.86 (0.77, 0.96)        |
| Malignant vascular tumors                                                                                                                        | Ref            | 1.07 (0.59, 1.96) | 0.8 (0.44, 1.46)  | 0.92 (0.51, 1.67) | 0.72 (0.4, 1.31)  | 0.92 (0.81, 1.05)        |
| UPS                                                                                                                                              | Ref            | 0.9 (0.42, 1.88)  | 0.69 (0.33, 1.45) | 0.95 (0.48, 1.89) | 0.75 (0.38, 1.5)  | 0.95 (0.82, 1.11)        |
| Unclassified sarcomas                                                                                                                            | Ref            | 0.66 (0.43, 1.01) | 0.68 (0.45, 1.03) | 0.6 (0.39, 0.91)  | 0.57 (0.38, 0.87) | 0.88 (0.8, 0.97)         |
| <b>Older Adult (65 years + )</b>                                                                                                                 |                |                   |                   |                   |                   |                          |
| GIST                                                                                                                                             | Ref            | 1.06 (0.74, 1.53) | 0.93 (0.64, 1.35) | 0.96 (0.67, 1.37) | 0.82 (0.58, 1.18) | 0.95 (0.88, 1.03)        |
| Leiomyosarcoma                                                                                                                                   | Ref            | 0.96 (0.66, 1.4)  | 0.94 (0.65, 1.36) | 0.95 (0.66, 1.38) | 0.8 (0.55, 1.15)  | 0.95 (0.88, 1.03)        |
| Liposarcoma                                                                                                                                      | Ref            | 1.04 (0.52, 2.12) | 1.2 (0.63, 2.39)  | 0.91 (0.47, 1.82) | 1.19 (0.65, 2.31) | 1.02 (0.89, 1.18)        |
| Malignant vascular tumors                                                                                                                        | Ref            | 0.88 (0.42, 1.87) | 1 (0.5, 2.02)     | 0.89 (0.46, 1.78) | 1.04 (0.53, 2.08) | 1.01 (0.87, 1.18)        |
| UPS                                                                                                                                              | Ref            | 0.49 (0.24, 1)    | 0.61 (0.32, 1.16) | 0.5 (0.26, 0.98)  | 0.49 (0.26, 0.93) | 0.87 (0.75, 1.01)        |
| Unclassified sarcomas                                                                                                                            | Ref            | 0.54 (0.32, 0.9)  | 0.56 (0.34, 0.92) | 0.55 (0.34, 0.9)  | 0.52 (0.32, 0.84) | 0.89 (0.8, 0.99)         |

Abbreviations: ES = Ewing sarcoma; RMS = rhabdomyosarcoma; ARMS = Alveolar RMS; F/MF. = Fibroblastic or Myofibroblastic; MPNST = malignant peripheral nerve sheath tumor; DSRCT = Desmoplastic small round cell tumor, GIST = gastrointestinal stromal tumor, UPS = undifferentiated pleomorphic sarcoma; Ref = reference category; Q1 corresponds to lowest SES quintile, Q5 corresponds to highest. <sup>a</sup>All data reported as odds ratio (99% CI). <sup>b</sup> Results obtained from evaluating SES as an ordinal variable.

eTable 5. Unadjusted OR for Metastatic Sarcoma by Race/Ethnicity, Stratified by Age Group and Sarcoma Subtype: SEER 16 Registries, 2001–2015<sup>a</sup>

|                                  | Race/Ethnicity |                    |                   |                   |
|----------------------------------|----------------|--------------------|-------------------|-------------------|
|                                  | NHW            | NHB                | Hispanic          | AIAN/API          |
| <b>Pediatric (&lt; 20 years)</b> |                |                    |                   |                   |
| Osteosarcoma                     | Ref            | 1.2 (0.74, 1.9)    | 1.36 (0.94, 1.95) | 0.98 (0.51, 1.79) |
| ES of bone                       | Ref            | 0.74 (0.16, 2.54)  | 1.39 (0.9, 2.12)  | 0.99 (0.46, 2.04) |
| ARMS                             | Ref            | 1.03 (0.52, 2.05)  | 1.03 (0.58, 1.81) | 1.33 (0.58, 3.04) |
| Embryonal RMS                    | Ref            | 1.07 (0.51, 2.09)  | 1.29 (0.73, 2.22) | 1.05 (0.34, 2.73) |
| <b>Adult (20 - 65 years)</b>     |                |                    |                   |                   |
| Osteosarcoma                     | Ref            | 1.47 (0.82, 2.56)  | 1.32 (0.81, 2.11) | 1.16 (0.55, 2.26) |
| ES of bone                       | Ref            | 4.51 (1.08, 26.98) | 1.36 (0.69, 2.66) | 1.09 (0.3, 3.64)  |
| Chondrosarcoma                   | Ref            | 0.78 (0.23, 1.97)  | 1.18 (0.64, 2.08) | 1.05 (0.34, 2.58) |
| Other RMS                        | Ref            | 0.93 (0.4, 2.07)   | 1.31 (0.63, 2.71) | 0.45 (0.13, 1.29) |
| F/MF tumors                      | Ref            | 0.72 (0.37, 1.32)  | 1.04 (0.55, 1.85) | 1.08 (0.49, 2.14) |
| Synovial sarcoma                 | Ref            | 1.01 (0.51, 1.88)  | 1.02 (0.64, 1.58) | 1.02 (0.47, 2.01) |
| ES of soft tissue                | Ref            | 0.92 (0.19, 3.5)   | 1.8 (0.94, 3.43)  | 1.42 (0.61, 3.18) |
| MPNST                            | Ref            | 1.18 (0.59, 2.22)  | 1.07 (0.55, 1.97) | 1.37 (0.6, 2.88)  |
| DSRCT                            | Ref            | 0.6 (0.21, 1.77)   | 1.06 (0.34, 3.62) | 0.85 (0.2, 4.43)  |
| GIST                             | Ref            | 0.92 (0.7, 1.19)   | 0.93 (0.69, 1.24) | 0.99 (0.73, 1.33) |
| Leiomyosarcoma                   | Ref            | 2.02 (1.64, 2.5)   | 1.39 (1.12, 1.73) | 1.53 (1.16, 2)    |
| Liposarcoma                      | Ref            | 1.11 (0.61, 1.88)  | 1.19 (0.78, 1.75) | 1.21 (0.67, 2.05) |
| Malignant vascular tumors        | Ref            | 1.17 (0.65, 2.09)  | 1.2 (0.72, 1.98)  | 1.22 (0.64, 2.28) |
| UPS                              | Ref            | 1.24 (0.56, 2.49)  | 1.14 (0.6, 2.05)  | 1.31 (0.52, 2.86) |
| Unclassified sarcomas            | Ref            | 1.7 (1.15, 2.5)    | 1.41 (0.98, 2.01) | 1.15 (0.69, 1.86) |
| <b>Older Adult (65 years + )</b> |                |                    |                   |                   |
| GIST                             | Ref            | 1.01 (0.73, 1.38)  | 1.18 (0.8, 1.7)   | 0.69 (0.47, 0.97) |
| Leiomyosarcoma                   | Ref            | 1.89 (1.34, 2.64)  | 1.26 (0.85, 1.85) | 1.6 (1.02, 2.45)  |
| Liposarcoma                      | Ref            | 0.51 (0.14, 1.34)  | 1.22 (0.69, 2.05) | 0.77 (0.34, 1.53) |
| Malignant vascular tumors        | Ref            | 1.57 (0.59, 3.8)   | 1.46 (0.73, 2.79) | 1.48 (0.78, 2.73) |
| UPS                              | Ref            | 2.86 (1.21, 6.01)  | 1.22 (0.5, 2.56)  | 1.84 (0.79, 3.76) |
| Unclassified sarcomas            | Ref            | 1.56 (0.86, 2.7)   | 2.1 (1.26, 3.42)  | 1.32 (0.7, 2.35)  |

ES = Ewing sarcoma; RMS = rhabdomyosarcoma; ARMS = Alveolar RMS; F/MF. = fibroblastic or myofibroblastic; MPNST = malignant peripheral nerve sheath tumor; DSRCT = Desmoplastic small round cell tumor, GIST = gastrointestinal stromal tumor, UPS = undifferentiated pleomorphic sarcoma; Ref = reference. NH = Non-Hispanic; H = Hispanic; W = White; B = Black; AIAN/API = American Indian, Alaskan native, Asian Pacific Islander. <sup>a</sup>All data reported as odds ratio (99% CI).

eTable 6. Unadjusted OR for Metastases at Diagnosis in Adults (20–65 Years at Diagnosis) by Insurance Status, Stratified by Sarcoma Subtype: SEER 16 Registries (2007–2015)<sup>a</sup>

| subtype               | Insurance status <sup>b</sup> |                   |                   |
|-----------------------|-------------------------------|-------------------|-------------------|
|                       | Insured                       | Medicaid          | Uninsured         |
| Osteosarcoma          | Ref                           | 1.68 (0.95, 2.91) | 1.19 (0.39, 3.06) |
| ES of bone            | Ref                           | 1.31 (0.6, 2.87)  | 1.19 (0.22, 5.68) |
| Synovial sarcoma      | Ref                           | 1.94 (1.07, 3.44) | 1.99 (0.88, 4.19) |
| GIST                  | Ref                           | 1.61 (1.14, 2.25) | 1.71 (1.08, 2.66) |
| Leiomyosarcoma        | Ref                           | 1.66 (1.27, 2.15) | 1.09 (0.71, 1.65) |
| Liposarcoma           | Ref                           | 2.22 (1.35, 3.54) | 2.27 (1.01, 4.55) |
| Vascular tumors       | Ref                           | 2.06 (1.18, 3.63) | 1.24 (0.39, 3.7)  |
| Unclassified sarcomas | Ref                           | 1.98 (1.32, 2.94) | 1.47 (0.79, 2.6)  |

Abbreviations: ES = Ewing sarcoma; GIST = gastrointestinal stromal tumor; NHB = Non-Hispanic Black; AIAN/API = American Indian, Alaskan Native, Asian Pacific Islander; <sup>a</sup> All data reported as odds ratio (99% CI). <sup>b</sup> Reference category = insured;
